# Supplementary material for: Raman Spectroscopy and Thermoelectric Characterization of Composite Thin Films of Cu2ZnSnS4 Nanocrystals Embedded in a Conductive Polymer PEDOT:PSS
Source: MDPI journal article supplement (doi:10.3390/nano13010041), 2022-12-22
Supplement: s1 [file s1]

## Supplementary information

### Raman spectroscopy and thermoelectric characterization of composite thin films of $\text{Cu}_2\text{ZnSnS}_4$ nanocrystals embedded in a conductive polymer PEDOT:PSS

Ye. Havryliuk<sup>1,2,3,\*</sup>, V. Dzhagan<sup>3,4</sup>, A. Karnaukhov<sup>3</sup>, O. Selyshchev<sup>1,2</sup>, J. Hann<sup>2</sup>, D.R.T. Zahn<sup>1,2</sup>

<sup>1</sup> Semiconductor Physics, Chemnitz University of Technology, 09107, Chemnitz, Germany

<sup>2</sup> Center for Materials, Architectures, and Integration of Nanomembranes (MAIN), 09126 Chemnitz, Germany

<sup>3</sup> V.E. Lashkaryov Institute of Semiconductor Physics NAS of Ukraine, 03028 Kyiv, Ukraine

<sup>4</sup> Physics Department, Taras Shevchenko National University of Kyiv, 60 Volodymyrs'ka str., 01601 Kyiv, Ukraine

\* Correspondence: yevhenii.havryliuk@physik.tu-chemnitz.de

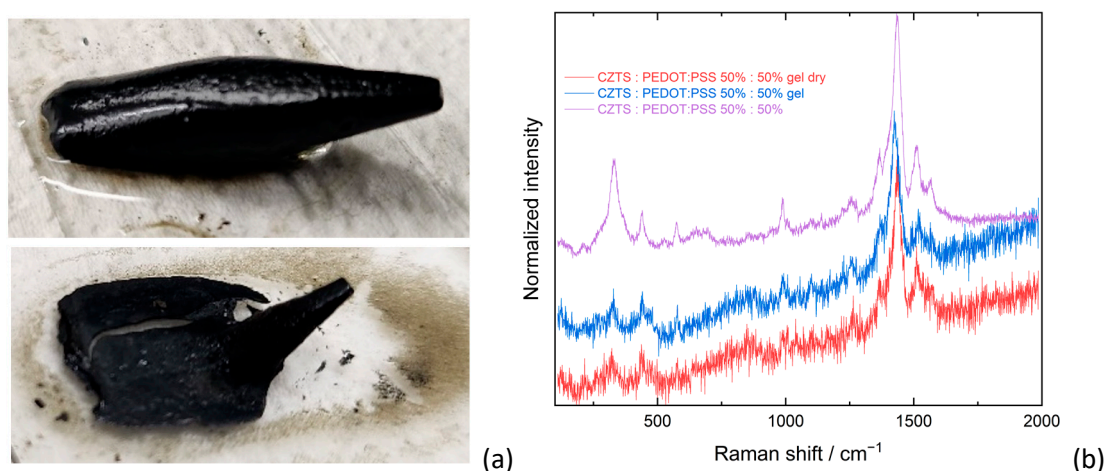

**Figure S1.** (a) Fresh gel (upper photo) and after drying under the hood for 12 hours (bottom). (b) Raman spectra of fresh mixture, fresh gel, and gel after drying.

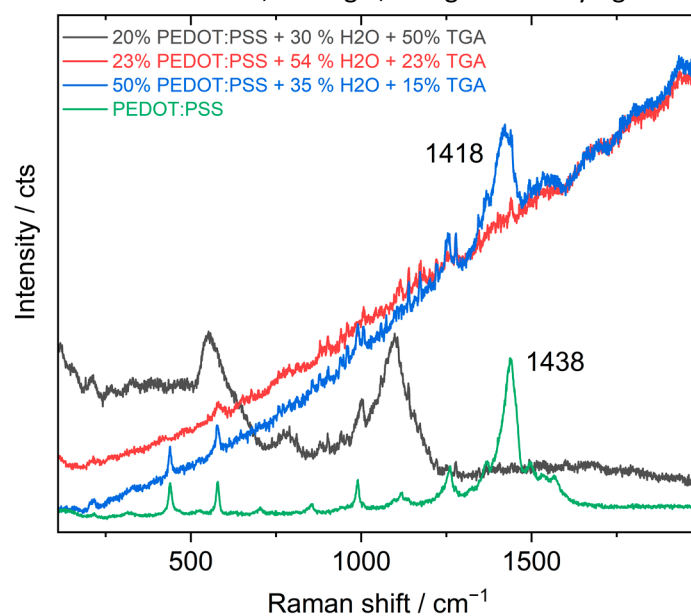

**Figure S2.** Control experiment with effect of pure TGA solution on the Raman spectrum of PEDOT:PSS.

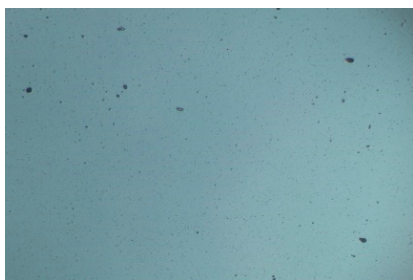

(a)

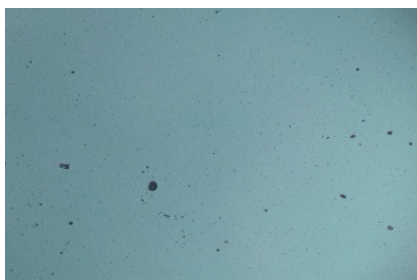

(b)

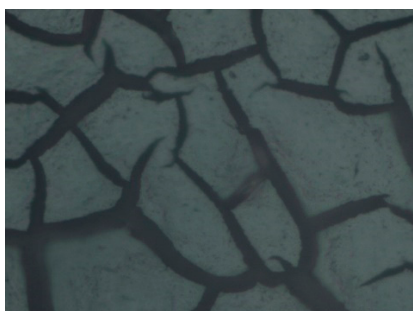

(c)

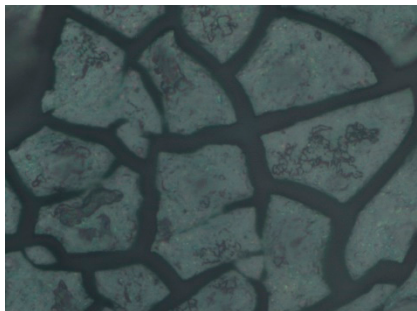

(d)

**Figure S3.** Optical image of PEDOT:PSS film (a) before and (b) after  $12\text{J}/\text{cm}^2$  FLA; and CZTS NCs film (c) before and (d) after  $12\text{J}/\text{cm}^2$  FLA
