# Supplementary material for: Raman Spectroscopy and Thermoelectric Characterization of Composite Thin Films of Cu2ZnSnS4 Nanocrystals Embedded in a Conductive Polymer PEDOT:PSS
Source: Nanomaterials (Basel). 2022 Dec 22;13(1):41. doi: 10.3390/nano13010041 (PMC9824269; doi:10.3390/nano13010041)
Supplement: Supplementary file 1 [file nanomaterials-13-00041-s001.zip]

Archive with 8 entries (8 files):
- FLA treated CZTS NCs - PEDOT PSS_SI.pdf
- S1a.jpg
- S1b.gif
- S2.gif
- S3a.jpg
- S3b.jpg
- S3c.jpg
- S3d.jpg
